# Supplementary material for: High photocatalytic activity of plasmonic Ag@AgCl/Zn2SnO4 nanocomposites synthesized using hydrothermal method
Source: Royal Society of Chemistry journal article supplement (doi:10.1039/c6ra14813a), 2016-01-01
Supplement: c6ra14813a1.pdf [file c6ra14813a1.pdf]

**High photocatalytic activity of plasmonic Ag@AgCl/Zn<sub>2</sub>SnO<sub>4</sub>  
nanocomposites synthesized using hydrothermal method**

Monaam Ben Ali,<sup>1,2\*</sup> Abderrahmane Hamdi,<sup>1</sup> Habib Elhouichet,<sup>1,2</sup> Brigitte Sieber,<sup>3</sup> Ahmed Addad,<sup>3</sup> Yannick Coffinier,<sup>4</sup> Luc Boussekey,<sup>5</sup> Mokhtar Férid,<sup>1</sup> Sabine Szunerits<sup>4</sup> and Rabah Boukherroub<sup>4\*</sup>

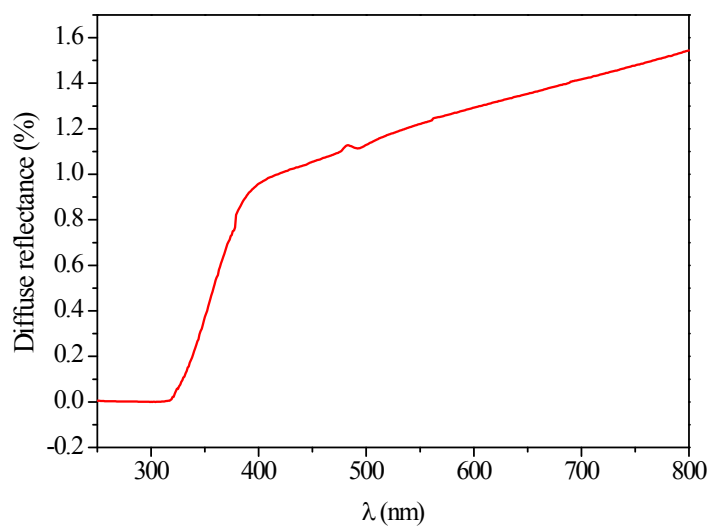

**Figure S1.** Diffuse reflectance of ZTO NPs.

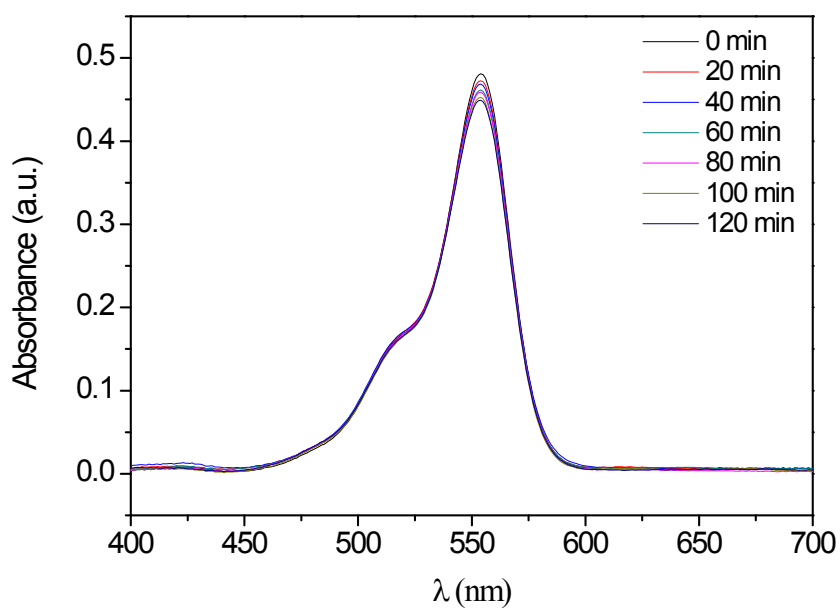

**Figure S2.** UV-vis absorption spectra of RhB ( $5 \times 10^{-6}$  M) before and after irradiation in the absence of catalyst as a function of irradiation time under visible light irradiation ( $\lambda_{\text{ex}} > 420$  nm,  $P = 0.5$  W).

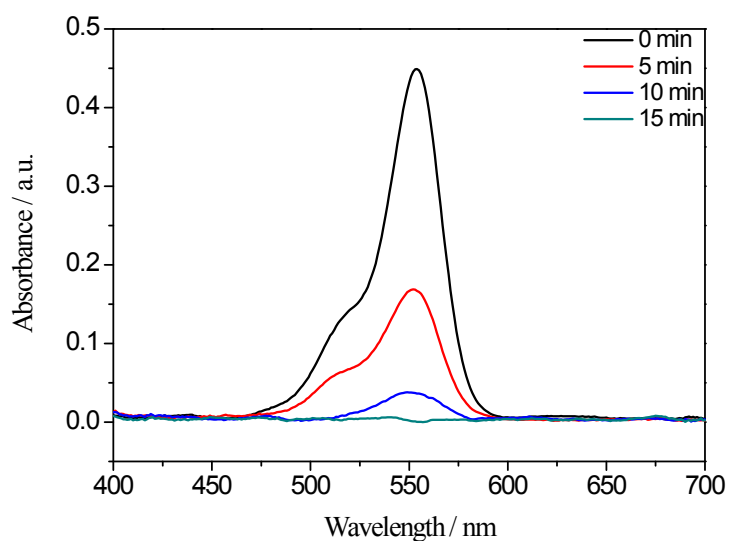

**Figure S3.** UV-vis absorption spectra of RhB( $5 \times 10^{-6}$  M) before and after irradiation in the presence of Z-Ag2 (1g/L) sample as a function of irradiation time under visiblelight irradiation ( $\lambda_{\text{ex}} > 420$  nm, P=0.5 W).

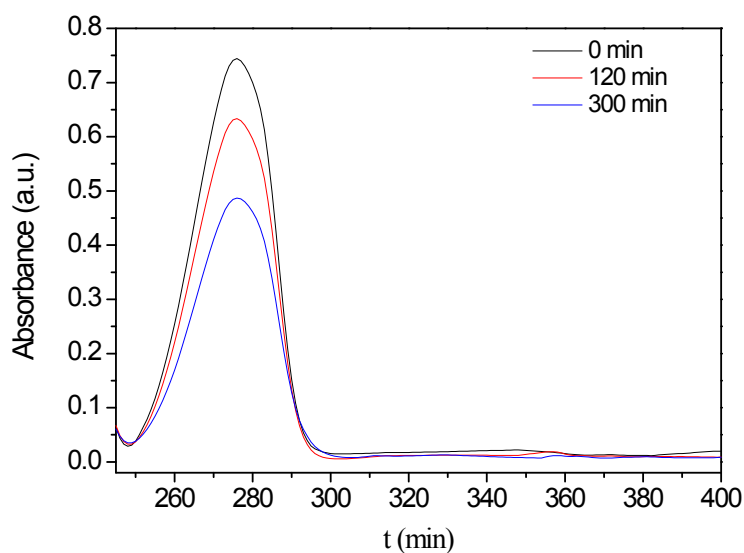

**Figure S4.** UV-vis absorption spectra of Bisphenol A (0.3 mM) before and after irradiation in the presence of Z-Ag2 (1g/L) sample as a function of irradiation time under visible light irradiation ( $\lambda_{\text{ex}} > 420$  nm, P=0.5 W).

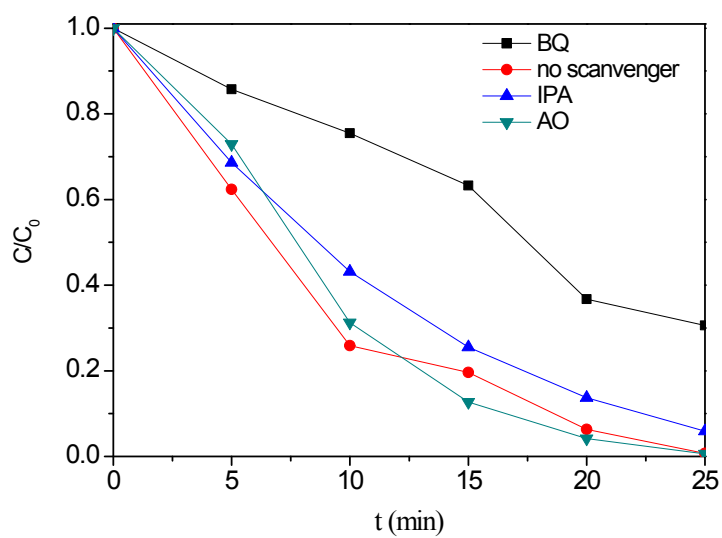

**Figure S5.** Photocatalytic degradation of RhB over Ag@AgCl/ZTO (Z-Ag<sub>2</sub>, 1g/L) alone and in the presence of OA, IPA and BQ scavengers under visible light.
